# Supplementary material for: Cost of treatment for head and neck cancer in India
Source: PubMed Central journal article supplement (PMC5764364; doi:10.1371/journal.pone.0191132), 2018-01-11
Supplement: pone.0191132.s003.pdf [file pone.0191132.s003.pdf]

# Cost effectiveness of IMRT versus Conventional Radiotherapy for the treatment of Head and Neck Cancers in India

## GENERAL INFORMATION

C.R. No.....

Patient Id\*.../.../.....

RT Number.....

Date of Interview ----/----/----

Diagnosis: .....

Type of treatment: .....

Type of radiotherapy: .....

1) Name of Patient .....

2) Address of Patient

House No. \_\_\_\_\_

Sector/Street \_\_\_\_\_

City/State \_\_\_\_\_

Contact No.

Home \_\_\_\_\_ Office \_\_\_\_\_ Mobile \_\_\_\_\_

Email id \_\_\_\_\_

3) Gender

a) Male

b) Female

4) Age of Patient (In completed years)

5) Name of Respondent/Caregiver .....

6) Relation with Patient .....

7) Address of Respondent/Caregiver

House No. \_\_\_\_\_

Sector/Street \_\_\_\_\_

City/State \_\_\_\_\_

Contact No.

Home \_\_\_\_\_ Office \_\_\_\_\_ Mobile \_\_\_\_\_

Email id \_\_\_\_\_

8) Religion

- a) Hindu
- b) Muslim
- c) Sikh
- d) Christian
- f) Others

9) Caste

- a) Schedule caste
- b) Schedule tribe
- c) OBC
- d) General
- f) Others

10) Locality

- a) Urban
- b) Slum
- c) Rural

11) Educational status

- a) Illiterate
- b) Primary
- c) Middle
- d) Matric
- e) Senior secondary
- f) Graduation
- g) Post graduation

12) Occupation

- a) Cultivator
- b) Agricultural wage labourer
- c) Non-agricultural wage labourer
- d) Own account worker
- e) Employer
- f) Unpaid family worker
- g) Regular salaried/Wage employee
- h) Unemployed
- i) Rentier/Pensioner/Other remittances recipient
- j) Not able to work due to disability
- k) Too old to work
- l) Others

13) Marital Status

- a) Unmarried
- b) Married
- c) Separated/Divorced
- d) Widow/Widower

14) Type of Insurance

- a) BPL free/poor free
- b) Government employee
- c) RSBY
- d) Private Insurance
- e) NRHM scheme
- f) Any other, specify.....
- g) NO

- 15) Gross Monthly Income (Patient).....Rs
- 16) Total family income .....Rs
- 17) Total number of family members.....
- 18) Total number of family members aged >10 years.....
- 19) Total number of family members aged <10 years.....
- 20) How many health facilities did you visit before coming to study hospital?
- 21) Where did you went, when you first came across the symptoms?
  - a) Government facility, specify.....
  - b) Private facility, specify.....
  - c) Any other specify.....
- 22) When did you visit the above mentioned facility?.....
- 23) Date of presentation at the study hospital? .....
- 24) Date of start of radiotherapy treatment?.....
- 25) Date of end of radiotherapy treatment?.....
- 26) What was the duration of total treatment in the study hospital?.....
- 27) Any co morbidity.....
- 28) Previous history of
  - a. Smoking
  - b. Alcohol consumption
  - c. Tobacco chewing
  - d. Any other
- 29) Performance status after treatment (at the time of interview).....

### Tumour related Information:

|                               |                             |                                                                                                                                                           |
|-------------------------------|-----------------------------|-----------------------------------------------------------------------------------------------------------------------------------------------------------|
| <b>Tumour site</b>            | <i>Oropharynx</i>           |                                                                                                                                                           |
|                               | <i>Hypopharynx</i>          |                                                                                                                                                           |
|                               | <i>Supra-glottic region</i> |                                                                                                                                                           |
|                               | <i>Any other, specify</i>   |                                                                                                                                                           |
| <b>Tumour stage</b>           | <i>Tis</i>                  |                                                                                                                                                           |
|                               | <i>T1</i>                   |                                                                                                                                                           |
|                               | <i>T2</i>                   |                                                                                                                                                           |
|                               | <i>T3</i>                   |                                                                                                                                                           |
|                               | <i>T4a</i>                  |                                                                                                                                                           |
|                               | <i>T4b</i>                  |                                                                                                                                                           |
| <b>Nodal stage</b>            | <i>N0</i>                   |                                                                                                                                                           |
|                               | <i>N1</i>                   |                                                                                                                                                           |
|                               | <i>N2</i>                   |                                                                                                                                                           |
|                               | <i>N2a</i>                  |                                                                                                                                                           |
|                               | <i>N2b</i>                  |                                                                                                                                                           |
|                               | <i>N2c</i>                  |                                                                                                                                                           |
|                               | <i>N3</i>                   |                                                                                                                                                           |
| <b>Tumour stage</b>           | <i>0</i>                    |                                                                                                                                                           |
|                               | <i>I</i>                    |                                                                                                                                                           |
|                               | <i>II</i>                   |                                                                                                                                                           |
|                               | <i>III</i>                  |                                                                                                                                                           |
|                               | <i>Iva</i>                  |                                                                                                                                                           |
| <b>WHO performance status</b> | <i>0</i>                    | Fully active, able to carry on all pre-disease performance without restriction                                                                            |
|                               | <i>1</i>                    | Restricted in physically strenuous activity but ambulatory and able to carry out work of a light or sedentary nature, e.g., light house work, office work |
|                               | <i>2</i>                    | Ambulatory and capable of all selfcare but unable to carry out any work activities. Up and about more than 50% of waking hours                            |
|                               | <i>3</i>                    | Capable of only limited selfcare, confined to bed or chair more than 50% of waking hours                                                                  |
|                               | <i>4</i>                    | Completely disabled. Cannot carry on any selfcare. Totally confined to bed or chair                                                                       |
|                               | <i>5</i>                    | Dead                                                                                                                                                      |

## CONSUMPTION EXPENDITURE

| How much does your family spend per month on following items:                                                        | Expense |         |          |
|----------------------------------------------------------------------------------------------------------------------|---------|---------|----------|
|                                                                                                                      | 7 days  | 30 days | 365 days |
| i. Food: ration (Cereals, pulses, edible oil, bread etc.), Fruits and vegetables, Milk, Milk products, Beverages etc |         |         |          |
| ii. Education (Books, newspaper, fees)                                                                               |         |         |          |
| iii. Health                                                                                                          |         |         |          |
| iv. Bills (Electricity, telephone, water)                                                                            |         |         |          |
| v. Conveyance, fuel                                                                                                  |         |         |          |
| vi. Rents                                                                                                            |         |         |          |
| vii. Clothing, Footwear, bedding, curtains etc                                                                       |         |         |          |
| viii. Entertainment (Cable, cinema, sports, recreation & hobbies)                                                    |         |         |          |
| ix. Personal effects (Watch, mobile phone, spectacles, toiletries, jewellery)                                        |         |         |          |
| x. Consumer services (Domestic help, cook, sweeper, barber, tailor, priest, beautician)                              |         |         |          |
| xi. Pan, Tobacco, alcohol or any other intoxicants                                                                   |         |         |          |
| xii. Miscellaneous (household appliances, furniture, crockery, animals, or any family function)                      |         |         |          |
| xiii. Total Monthly Expenditure (to be calculated from above)                                                        |         |         |          |

## OUT OF POCKET EXPENDITURE

### Expenditure before coming to the study hospital

| Source of expenditure                                                | Out of Pocket Expenditure |
|----------------------------------------------------------------------|---------------------------|
| Travelling cost                                                      |                           |
| Medicines                                                            |                           |
| Lab tests/ Diagnostics                                               |                           |
| Procedure/Surgery                                                    |                           |
| User fees/Hospital charges (including bed charges, diagnostics etc.) |                           |
| Informal payment                                                     |                           |
| Boarding/Lodging                                                     |                           |
| Food                                                                 |                           |
| Other                                                                |                           |
| Total                                                                |                           |

### Source of finance

| Source                                           | Amount |
|--------------------------------------------------|--------|
| Salary/Savings                                   |        |
| Selling of assets                                |        |
| Borrowed from relatives/friends without interest |        |
| Borrowed with interest                           |        |
| Health insurance                                 |        |
| Any other (specify)                              |        |

### **Expenditure on Pre-Radiotherapy treatment at the study hospital**

| <b>Source of expenditure</b>                                         | <b>Out of Pocket Expenditure</b> |
|----------------------------------------------------------------------|----------------------------------|
| Travelling cost                                                      |                                  |
| Medicines                                                            |                                  |
| Lab tests/ Diagnostics                                               |                                  |
| Procedure/Surgery                                                    |                                  |
| User fees/Hospital charges (including bed charges, diagnostics etc.) |                                  |
| Informal payment                                                     |                                  |
| Boarding/Lodging                                                     |                                  |
| Food                                                                 |                                  |
| Other                                                                |                                  |
| Total                                                                |                                  |

### **Source of finance on pre radiotherapy treatment**

| <b>Source</b>                                    | <b>Amount</b> |
|--------------------------------------------------|---------------|
| Salary/Savings                                   |               |
| Selling of assets                                |               |
| Borrowed from relatives/friends without interest |               |
| Borrowed with interest                           |               |
| Health insurance                                 |               |
| Any other (specify)                              |               |

### 1. Expenditure due to Radiotherapy treatment

| Out of Pocket Expenditure                                            | Week 1 |   |   |   |   |   |   |
|----------------------------------------------------------------------|--------|---|---|---|---|---|---|
|                                                                      | 1      | 2 | 3 | 4 | 5 | 6 | 7 |
| Travelling cost                                                      |        |   |   |   |   |   |   |
| Medicines                                                            |        |   |   |   |   |   |   |
| Lab tests/ Diagnostics                                               |        |   |   |   |   |   |   |
| Procedure/Surgery                                                    |        |   |   |   |   |   |   |
| User fees/Hospital charges (including bed charges, diagnostics etc.) |        |   |   |   |   |   |   |
| Informal payment                                                     |        |   |   |   |   |   |   |
| Boarding/Lodging/Food                                                |        |   |   |   |   |   |   |
| Other1                                                               |        |   |   |   |   |   |   |
| Total                                                                |        |   |   |   |   |   |   |

| Out of Pocket Expenditure                                            | Week 2 |   |   |   |   |   |   |
|----------------------------------------------------------------------|--------|---|---|---|---|---|---|
|                                                                      | 1      | 2 | 3 | 4 | 5 | 6 | 7 |
| Travelling cost                                                      |        |   |   |   |   |   |   |
| Medicines                                                            |        |   |   |   |   |   |   |
| Lab tests/ Diagnostics                                               |        |   |   |   |   |   |   |
| Procedure/Surgery                                                    |        |   |   |   |   |   |   |
| User fees/Hospital charges (including bed charges, diagnostics etc.) |        |   |   |   |   |   |   |
| Informal payment                                                     |        |   |   |   |   |   |   |
| Boarding/Lodging/Food                                                |        |   |   |   |   |   |   |
| Other1                                                               |        |   |   |   |   |   |   |
| Total                                                                |        |   |   |   |   |   |   |



| Out of Pocket Expenditure                                            | Week 3 |   |   |   |   |   |   |
|----------------------------------------------------------------------|--------|---|---|---|---|---|---|
|                                                                      | 1      | 2 | 3 | 4 | 5 | 6 | 7 |
| Travelling cost                                                      |        |   |   |   |   |   |   |
| Medicines                                                            |        |   |   |   |   |   |   |
| Lab tests/ Diagnostics                                               |        |   |   |   |   |   |   |
| Procedure/Surgery                                                    |        |   |   |   |   |   |   |
| User fees/Hospital charges (including bed charges, diagnostics etc.) |        |   |   |   |   |   |   |
| Informal payment                                                     |        |   |   |   |   |   |   |
| Boarding/Lodging/Food                                                |        |   |   |   |   |   |   |
| Other1                                                               |        |   |   |   |   |   |   |
| Total                                                                |        |   |   |   |   |   |   |

| Out of Pocket Expenditure                                            | Week 4 |   |   |   |   |   |   |
|----------------------------------------------------------------------|--------|---|---|---|---|---|---|
|                                                                      | 1      | 2 | 3 | 4 | 5 | 6 | 7 |
| Travelling cost                                                      |        |   |   |   |   |   |   |
| Medicines                                                            |        |   |   |   |   |   |   |
| Lab tests/ Diagnostics                                               |        |   |   |   |   |   |   |
| Procedure/Surgery                                                    |        |   |   |   |   |   |   |
| User fees/Hospital charges (including bed charges, diagnostics etc.) |        |   |   |   |   |   |   |
| Informal payment                                                     |        |   |   |   |   |   |   |
| Boarding/Lodging/Food                                                |        |   |   |   |   |   |   |
| Other1                                                               |        |   |   |   |   |   |   |
| Total                                                                |        |   |   |   |   |   |   |

| Out of Pocket Expenditure                                            | Week 5 |   |   |   |   |   |   |
|----------------------------------------------------------------------|--------|---|---|---|---|---|---|
|                                                                      | 1      | 2 | 3 | 4 | 5 | 6 | 7 |
| Travelling cost                                                      |        |   |   |   |   |   |   |
| Medicines                                                            |        |   |   |   |   |   |   |
| Lab tests/ Diagnostics                                               |        |   |   |   |   |   |   |
| Procedure/Surgery                                                    |        |   |   |   |   |   |   |
| User fees/Hospital charges (including bed charges, diagnostics etc.) |        |   |   |   |   |   |   |
| Informal payment                                                     |        |   |   |   |   |   |   |
| Boarding/Lodging/Food                                                |        |   |   |   |   |   |   |
| Other1                                                               |        |   |   |   |   |   |   |
| Total                                                                |        |   |   |   |   |   |   |

| Out of Pocket Expenditure                                            | Week 6 |   |   |   |   |   |   |
|----------------------------------------------------------------------|--------|---|---|---|---|---|---|
|                                                                      | 1      | 2 | 3 | 4 | 5 | 6 | 7 |
| Travelling cost                                                      |        |   |   |   |   |   |   |
| Medicines                                                            |        |   |   |   |   |   |   |
| Lab tests/ Diagnostics                                               |        |   |   |   |   |   |   |
| Procedure/Surgery                                                    |        |   |   |   |   |   |   |
| User fees/Hospital charges (including bed charges, diagnostics etc.) |        |   |   |   |   |   |   |
| Informal payment                                                     |        |   |   |   |   |   |   |
| Boarding/Lodging/Food                                                |        |   |   |   |   |   |   |
| Other1                                                               |        |   |   |   |   |   |   |
| Total                                                                |        |   |   |   |   |   |   |

| Out of Pocket Expenditure                                            | Week 7 |   |   |   |   |   |   |
|----------------------------------------------------------------------|--------|---|---|---|---|---|---|
|                                                                      | 1      | 2 | 3 | 4 | 5 | 6 | 7 |
| Travelling cost                                                      |        |   |   |   |   |   |   |
| Medicines                                                            |        |   |   |   |   |   |   |
| Lab tests/ Diagnostics                                               |        |   |   |   |   |   |   |
| Procedure/Surgery                                                    |        |   |   |   |   |   |   |
| User fees/Hospital charges (including bed charges, diagnostics etc.) |        |   |   |   |   |   |   |
| Informal payment                                                     |        |   |   |   |   |   |   |
| Boarding/Lodging/Food                                                |        |   |   |   |   |   |   |
| Other I                                                              |        |   |   |   |   |   |   |
| Total                                                                |        |   |   |   |   |   |   |

| Out of Pocket Expenditure                                            | Week 8 |   |   |   |   |   |   |
|----------------------------------------------------------------------|--------|---|---|---|---|---|---|
|                                                                      | 1      | 2 | 3 | 4 | 5 | 6 | 7 |
| Travelling cost                                                      |        |   |   |   |   |   |   |
| Medicines                                                            |        |   |   |   |   |   |   |
| Lab tests/ Diagnostics                                               |        |   |   |   |   |   |   |
| Procedure/Surgery                                                    |        |   |   |   |   |   |   |
| User fees/Hospital charges (including bed charges, diagnostics etc.) |        |   |   |   |   |   |   |
| Informal payment                                                     |        |   |   |   |   |   |   |
| Boarding/Lodging/Food                                                |        |   |   |   |   |   |   |
| Other I                                                              |        |   |   |   |   |   |   |
| Total                                                                |        |   |   |   |   |   |   |

## 2. Source of Finance

| Source                                           | 1 <sup>st</sup><br>week | Amount | 2 <sup>nd</sup><br>week | Amount | 3 <sup>rd</sup><br>week | Amount | 4 <sup>th</sup><br>week | Amount |
|--------------------------------------------------|-------------------------|--------|-------------------------|--------|-------------------------|--------|-------------------------|--------|
| Salary/Savings                                   |                         |        |                         |        |                         |        |                         |        |
| Selling of assets                                |                         |        |                         |        |                         |        |                         |        |
| Borrowed from relatives/friends without interest |                         |        |                         |        |                         |        |                         |        |
| Borrowed with interest                           |                         |        |                         |        |                         |        |                         |        |
| Health insurance                                 |                         |        |                         |        |                         |        |                         |        |
| Any other (specify)                              |                         |        |                         |        |                         |        |                         |        |

\*Source; 1=Yes, 2=No

| Source                                           | 5 <sup>th</sup><br>week | Amount | 6 <sup>th</sup><br>week | Amount | 7 <sup>th</sup><br>week | Amount |
|--------------------------------------------------|-------------------------|--------|-------------------------|--------|-------------------------|--------|
| Salary/Savings                                   |                         |        |                         |        |                         |        |
| Selling of assets                                |                         |        |                         |        |                         |        |
| Borrowed from relatives/friends without interest |                         |        |                         |        |                         |        |
| Borrowed with interest                           |                         |        |                         |        |                         |        |
| Health insurance                                 |                         |        |                         |        |                         |        |
| Any other (specify)                              |                         |        |                         |        |                         |        |

### Expenditure on Chemotherapy/in-patient care in radiotherapy department

| Source of expenditure                                                | Out of Pocket Expenditure |
|----------------------------------------------------------------------|---------------------------|
| Travelling cost                                                      |                           |
| Medicines                                                            |                           |
| Lab tests/ Diagnostics                                               |                           |
| Procedure/Surgery                                                    |                           |
| User fees/Hospital charges (including bed charges, diagnostics etc.) |                           |
| Informal payment                                                     |                           |
| Boarding/Lodging                                                     |                           |
| Food                                                                 |                           |
| Other                                                                |                           |
| Total                                                                |                           |

### Source of finance

| Source                                           | Amount |
|--------------------------------------------------|--------|
| Salary/Savings                                   |        |
| Selling of assets                                |        |
| Borrowed from relatives/friends without interest |        |
| Borrowed with interest                           |        |
| Health insurance                                 |        |
| Any other (specify)                              |        |

***Data Collection Tool for Indirect expenditure due to treatment***

***Patient Details:***

1. What would you have been doing otherwise if you were not taking treatment? (Multiple response allowed)

Time spent (in hours) on:

|                             | 1 day | 1 week | 1 month |
|-----------------------------|-------|--------|---------|
| Household activities        | _____ | _____  | _____   |
| Childcare                   | _____ | _____  | _____   |
| Professional work           | _____ | _____  | _____   |
| Voluntary work              | _____ | _____  | _____   |
| Leisure activities          | _____ | _____  | _____   |
| Attending School/University | _____ | _____  | _____   |
| Seeking work                | _____ | _____  | _____   |
| Social work                 | _____ | _____  | _____   |
| Physical workout            | _____ | _____  | _____   |
| Other (specify)             | _____ | _____  | _____   |

2. Did other people take over and perform your usual household tasks during your hospital stay? If yes, fill the appropriate option, there can be more than one answer

|                             | Yes/No/NA | Paid/Unpaid | No. of hours |
|-----------------------------|-----------|-------------|--------------|
| Household activities        | _____     | _____       | _____        |
| Childcare                   | _____     | _____       | _____        |
| Professional work           | _____     | _____       | _____        |
| Voluntary work              | _____     | _____       | _____        |
| Leisure activities          | _____     | _____       | _____        |
| Attending School/University | _____     | _____       | _____        |
| Seeking work                | _____     | _____       | _____        |
| Social work                 | _____     | _____       | _____        |
| Physical workout            | _____     | _____       | _____        |
| Other (specify)             | _____     | _____       | _____        |

**Caregivers:**

|                                                                   | Caregiver 1 | Caregiver 2 | Caregiver 3 |
|-------------------------------------------------------------------|-------------|-------------|-------------|
| Relation with patient                                             |             |             |             |
| Address                                                           |             |             |             |
| Contact No.                                                       |             |             |             |
| No. of visits (per day)                                           |             |             |             |
| Total duration of Hospital stay (In hours)                        |             |             |             |
| Employment status (Yes/No)                                        |             |             |             |
| Nature of employment (Give codes as mentioned in the end of tool) |             |             |             |
| Monthly Gross Income of Caregiver (In Rs)                         |             |             |             |
| <b>Time spent daily (hours) on:</b>                               |             |             |             |
| <b>Household activities</b>                                       |             |             |             |
| Hours forgone due to care-giving                                  |             |             |             |
| Alternative { 1=Yes(paid), 2=Yes (unpaid), 3=No, 4=NA }           |             |             |             |
| No. of hours (alternative)                                        |             |             |             |
| Payment to alternative paid worker (In Rs)                        |             |             |             |
| <b>Childcare</b>                                                  |             |             |             |
| Hours forgone due to care-giving                                  |             |             |             |
| Alternative { 1=Yes(paid), 2=Yes (unpaid), 3=No, 4=NA }           |             |             |             |
| No. of hours (alternative)                                        |             |             |             |
| Payment to alternative paid worker (In Rs)                        |             |             |             |
| <b>Professional work</b>                                          |             |             |             |
| Hours forgone due to care-giving                                  |             |             |             |
| Alternative { 1=Yes(paid), 2=Yes (unpaid), 3=No, 4=NA }           |             |             |             |
| No. of hours (alternative)                                        |             |             |             |
| Payment to alternative paid worker (In Rs)                        |             |             |             |
| <b>Voluntary work</b>                                             |             |             |             |
| Hours forgone due to care-giving                                  |             |             |             |
| Alternative { 1=Yes(paid), 2=Yes (unpaid), 3=No, 4=NA }           |             |             |             |

|                                                         |  |  |  |
|---------------------------------------------------------|--|--|--|
| No. of hours (alternative)                              |  |  |  |
| Payment to alternative paid worker (In Rs)              |  |  |  |
| <b>Leisure activities</b>                               |  |  |  |
| Hours forgone due to care-giving                        |  |  |  |
| <b>Attending School/university</b>                      |  |  |  |
| Hours forgone due to care-giving                        |  |  |  |
| <b>Seeking work</b>                                     |  |  |  |
| Hours forgone due to care-giving                        |  |  |  |
| <b>Social work</b>                                      |  |  |  |
| Hours forgone due to care-giving                        |  |  |  |
| Alternative { 1=Yes(paid), 2=Yes (unpaid), 3=No, 4=NA } |  |  |  |
| No. of hours (alternative)                              |  |  |  |
| <b>Physical workout</b>                                 |  |  |  |
| Hours forgone due to care-giving                        |  |  |  |
| <b>Other (specify)</b>                                  |  |  |  |
| Hours forgone due to care-giving                        |  |  |  |
| Alternative { 1=Yes(paid), 2=Yes (unpaid), 3=No, 4=NA } |  |  |  |
| No. of hours (alternative)                              |  |  |  |

\* *Alternative Worker*; Yes (Paid) =1, Yes (Unpaid) =2, No=3, Not Applicable (NA) =4  
*Employment Status*; Cultivator=1, Agricultural wage labourer=2, Non-agricultural wage labourer=3,  
Own account worker=4, Employer=5, Unpaid family worker=6, Regular  
salaried/Wage employee=7, Unemployed=8, Rentier/Pensioner/Other remittance recipient=9,  
Not able to work due to disability=10, Too old to work=11, Other



Due to care-giving was your performance at work affected:

|                                                              |                                                      |                                                                           |
|--------------------------------------------------------------|------------------------------------------------------|---------------------------------------------------------------------------|
| Care giving<br>had no<br>effect on<br>my daily<br>activities | 0    1    2    3    4    5    6    7    8    9    10 | Care giving<br>stops my daily<br>professional<br>activities<br>completely |
|--------------------------------------------------------------|------------------------------------------------------|---------------------------------------------------------------------------|

(Encircle a number)

1. Due to care-giving was your performance on non-professional activities like household chores, shopping, exercising, studies etc. affected.

|                                                              |                                                      |                                                                               |
|--------------------------------------------------------------|------------------------------------------------------|-------------------------------------------------------------------------------|
| Care giving<br>had no<br>effect on<br>my daily<br>activities | 0    1    2    3    4    5    6    7    8    9    10 | Care giving<br>stops my daily<br>non-professional<br>activities<br>completely |
|--------------------------------------------------------------|------------------------------------------------------|-------------------------------------------------------------------------------|

(Encircle a number)

I am grateful to you for taking the time and making the effort to complete this questionnaire.

If you have any comments, remarks or suggestions, please let me know.

Signature/thumb impression of the respondent/s
